1 **Metabolites alleviate staphylococcal bloodstream infection in a**  
2 **NO-dependent manner via arginase inhibition**

3

4 Rui Pang<sup>a</sup>, Yu-bin Su<sup>b</sup>, Hua Zhou<sup>c</sup>, Xinhai Chen<sup>d,e\*</sup>

5

6 <sup>a</sup> State Key Laboratory of Applied Microbiology Southern China, Guangdong Provincial  
7 Key Laboratory of Microbial Culture Collection and Application, Guangdong Open  
8 Laboratory of Applied Microbiology, Guangdong Institute of Microbiology, Guangdong  
9 Academy of Sciences, Guangzhou 510070, Guangdong, China

10 <sup>b</sup> Key Laboratory of Functional Protein Research of Guangdong Higher Education  
11 Institutes, Department of Biotechnology, College of Life Science and Technology, Jinan  
12 University, Guangzhou 510632, Guangdong, China

13 <sup>c</sup> Department of Respiratory and Critical Care Medicine, the First Affiliated Hospital,  
14 School of Medicine, Zhejiang University, Hangzhou 310003, Zhejiang, China

15 <sup>d</sup> Shenzhen International Institute for Biomedical Research, Shenzhen 518116,  
16 Guangdong, China

17 <sup>e</sup> Department of Microbiology, University of Chicago, Chicago, Illinois, USA

18 \*Address for correspondence: Department of Microbiology, University of Chicago,  
19 Chicago, Illinois, USA. Email: [xchen14@bsd.uchicago.edu](mailto:xchen14@bsd.uchicago.edu)

20 **Abstract**

21 *Staphylococcus aureus* is a notorious bacterial pathogen that often causes soft tissue  
22 and bloodstream infections and invariably garners resistance mechanisms against new  
23 antibiotics. Host innate immunity modulated by metabolites has been proved as a  
24 powerful strategy against bacterial infections. However, few studies focus on the  
25 application of this strategy against *S. aureus* infection. Here, we identified four metabolite  
26 biomarkers, L-proline, L-isoleucine, L-leucine, and L-valine (PILV), by a metabolomics  
27 study. In animal models of *S. aureus* bloodstream infection, exogenous administration of  
28 each metabolite or PILV shows an anti-infective effect, while PILV treatment has higher  
29 protection than individual metabolite treatment. Each metabolite targets nitric oxide (NO)  
30 to kill *S. aureus* via arginase inhibition, and PILV exhibits additive inhibition of arginase  
31 activity that causes further killing. This suppression also contributes to the  
32 metabolite-mediated phagocytic killing of *S. aureus* in human blood. Our finding  
33 demonstrates the metabolite-mediated innate immunity as a therapeutic intervention for  
34 *S. aureus* infection.

35

36 **Keywords:** metabolite, *Staphylococcus aureus*, bloodstream infection, nitric oxide,  
37 arginase,

38

39 The pathogen *Staphylococcus aureus* is both a human commensal and a significant  
40 cause of hospital- and community-acquired diseases including soft tissue infections,  
41 pneumonia, osteomyelitis, septic arthritis, bacteremia, endocarditis, and sepsis (1-3). The  
42 asymptomatic colonization is common; however, 80% invasive *S. aureus* strains isolated  
43 from the blood of patients with *S. aureus* bacteremia are genetically indistinguishable to  
44 the nasal strains detected at admission (4). Because of the high incidence of  
45 hospital-acquired infection, antibiotics are employed both for *S. aureus* decolonization  
46 and prophylaxis of nosocomial disease (5, 6). However, the emergence and spread of  
47 drug-resistant strains, designated MRSA (methicillin-resistant *S. aureus*), led to  
48 increased therapeutic failure and mortality rates due to *S. aureus* infections (6). Therefore,  
49 new approaches are especially needed for treating such infections in the clinic. One  
50 possible approach would be to enhance the innate immune response of the infected host,  
51 restoring the defense ability to kill the bacterial pathogen in a relatively risk-free manner  
52 (7).

53

54 Similar to other bacterial infections (8, 9), *S. aureus* infection causes several metabolisms  
55 changed pronouncedly in the host, which contain oxidative phosphorylation, aerobic  
56 glycolysis, and amino acid and fatty acid metabolisms (10-14). A growing body of recent  
57 studies shows that bacterial infection-induced shift of metabolisms has two leading roles,  
58 which either facilitate the bacterial invasion or benefits to the immune responses against  
59 bacterial infection. Host central carbon metabolism is capable of being strongly disturbed  
60 by *S. aureus*, which activates autophagy by increasing the phosphorylation of  
61 AMP-activated protein kinase and extracellular signal-regulated kinase, thereby meeting  
62 the staphylococcal invasion (15). Furthermore, the internalization of *S. aureus* employs  
63 two own pathways to destroy the host arginine metabolism, limiting the production of

64 nitric oxide (NO), which serves in the host's antibacterial defense, and eventually  
65 inducing death of the host cell (16, 17). On the other hand, studies focusing on the  
66 cross-talking between metabolic regulation and immune system reveal an active role of  
67 metabolic regulation in controlling the pathogenic bacteria. In several bacterial infection  
68 models, the host that survive the infection display distinctive metabolic pathways (18-23).  
69 Numerous metabolites identified from these metabolic pathways related to the survivors  
70 can be immunoregulators that modulate the function of the immune system via various  
71 mechanisms, including the activation of PI3K/Akt1, elevated expression of cytokines, and  
72 promotion of NO production (18-23). However, few studies are operated to investigate  
73 whether the modulation of host innate immunity by metabolites is a valuable strategy  
74 against staphylococcal infection.

75

76 Here, we used a gas chromatography-mass spectrometry (GC-MS) to identify  
77 metabolites from BALB/c mice infected by three increasing sublethal doses of *S. aureus*  
78 strain Newman. The results suggest that four metabolites (L-proline, L-isoleucine,  
79 L-leucine, and L-valine) target the NO production to kill *S. aureus*, which may aid in the  
80 development of therapeutic interventions that can improve the outcome of MRSA  
81 infection.

82

## 83 **Results**

### 84 **GC-MS-based metabolomics identifies host metabolites relating to *S. aureus*** 85 **infection**

86 To exploit anti-infection metabolites from the host, metabolic profiling with different  
87 degrees of anti-infection should be established. We hypothesized that different sublethal

88 infection doses would induce different degrees of anti-infection in the host. Therefore,  
89 BALB/c mice were intravenously challenged with Low, moderate, or high sublethal dose  
90 of *S. aureus* Newman or with PBS. 12 h later, plasma samples were separated from  
91 these challenged mice, and the GC-MS-based approach was used to identify crucial  
92 metabolites. A total of 72 metabolites were detected in each sample and displayed as a  
93 heat map (**Fig. 1A**). The heat map showed that the majority of metabolites were changed  
94 in abundance, suggesting that *S. aureus* infection altered the mouse plasma metabolome.  
95 No infection, low dose, moderate dose, and high dose groups could be distinguished by  
96 principal component analysis (PCA) using 72 metabolites (**Fig. 1B**), which demonstrated  
97 our hypothesis that hosts infected by different sublethal doses drive different metabolic  
98 profiling of anti-infection. After assaying, 48, 44, and 27 differential metabolites were  
99 respectively detected by comparisons of no infection and low dose group, of low and  
100 moderate dose groups, and of moderate and high dose groups (**Fig. 1C**), among which  
101 14 metabolites were shared (**Fig. 1C and 1D**). A subset of six metabolites, including  
102 L-leucine, L-proline, L-isoleucine, monolinolein, L-valine, and eicosanoic acid was  
103 significantly increased on infection from low dose to moderate dose to high dose (**Fig.**  
104 **1D**). These metabolites could serve as potential anti-infection biomarkers for *S. aureus*  
105 infection. Additionally, 14 shared metabolites enriched for four pathways containing  
106 aminoacyl-tRNA biosynthesis, citrate cycle, valine, leucine, and isoleucine degradation,  
107 and valine, leucine, and isoleucine biosynthesis ( $P < 0.05$ ) (**Fig. 1E**). Out of six metabolite  
108 biomarkers, four metabolites including L-leucine, L-proline, L-isoleucine, and L-valine  
109 were enriched in aminoacyl-tRNA biosynthesis, valine, leucine, and isoleucine  
110 degradation, and valine, leucine, and isoleucine biosynthesis, thereby motivating us to  
111 investigate these metabolite biomarkers in greater detail (**Fig. 1F**).

112

113 **Exogenous metabolites show the anti-infective effect on *S. aureus* infection**

114 To examine the potential anti-infective role of L-leucine, L-proline, L-isoleucine, or  
115 L-valine *in vivo*, cohorts of mice were intravenously infected with *S. aureus* Newman [ $1 \times$   
116  $10^7$  colony-forming units (CFU)] and injected with each metabolite ( $0.5 \text{ g kg}^{-1}$ ) or sterile  
117 saline (no metabolite control) daily. Compared to mice administrated with sterile saline,  
118 metabolite-injected mice significantly declined the bodyweight loss during *S. aureus*  
119 infection (**Fig. 2A**). When renal tissues were analyzed for bacterial burdens and  
120 histopathology and compared with saline-administrated animals, mice given metabolite  
121 displayed markedly reduced staphylococcal loads and numbers of abscess lesions (**Fig.**  
122 **2B and 2C**). Each metabolite vaccination also provided distinct protection against lethal  
123 bloodstream infection with USA300 ( $2 \times 10^8$  CFU) and MRSA252 ( $2 \times 10^9$  CFU) (**Fig. 2D**  
124 **and 2E**). Besides, there was no difference in the recovery of body weight, bacterial loads,  
125 abscess numbers, and survival among each metabolite administration (**Fig. 2A-2E**).  
126 More importantly, we surprisingly found that combined administration of L-proline,  
127 L-isoleucine, L-leucine and L-valine (PILV) is capable of promoting survival further (**Fig.**  
128 **2D and 2E**), which were not found by administration of 4-fold higher concentration of  
129 L-proline ( $2.0 \text{ g kg}^{-1}$ ) (**Fig. S1**), indicating the characteristically synergetic effect of four  
130 metabolites against staphylococcal infection. Thus, based on these data, we find that  
131 L-leucine, L-proline, L-isoleucine, or L-valine has an anti-infective function during *S.*  
132 *aureus* infection and PILV combination treatment would further improve the therapeutic  
133 effect on MRSA infection.

134

135 **Metabolites boost NO production by inhibition of arginase *in vivo***

136 Lipopolysaccharide (LPS), a component of the cell wall of Gram-negative bacteria,  
137 simultaneously induces expression of arginase (Arg) and NO synthase (NOS) in the host.  
138 However, it is unclear whether Gram-positive bacteria, *S. aureus*, is also able to induce  
139 both Arg and NOS expressions simultaneously. Thus we first measured NO production in  
140 serum samples and expression level of two Arg (cytoplasmic and mitochondrial arginase,  
141 designated as Arg1 and Arg2, respectively) and three NOS isozymes (neuronal, inducible,  
142 and endothelial NOS, designated as NOS1, 2, and 3, respectively) in tissues and blood  
143 upon *S. aureus* infection. Three days post sublethal infection of *S. aureus* Newman, NO  
144 production was enhanced in a dose-dependent manner (**Fig. 3A**). Furthermore,  
145 intravenous infection of *S. aureus* USA300 triggered the expression of all arginase and  
146 NOS isozymes and increased the NO production and arginase activity in mouse tissues  
147 (liver and kidney) and blood (or serum) except unchanged NOS3 expression in the blood  
148 (**Fig. 3B to 3J**). More interestingly, *S. aureus* infection induced more expression of Arg  
149 isozymes than NOS isozymes in tissues (**Fig. 3B and 3C**), suggesting that both Arg  
150 isozymes are predominant regulators of L-arginine since Arg and NOS compete with one  
151 another for L-arginine as an enzyme substrate. Then we asked whether L-leucine,  
152 L-proline, L-isoleucine, L-valine, or PILV have a mechanism that boosts NO production  
153 by blocking the arginase activity under the condition of *S. aureus* infection. Cohorts of  
154 mice were daily intraperitoneal injection of each metabolite with 0.5 g kg<sup>-1</sup> or 2.0 g kg<sup>-1</sup> or  
155 of PILV (0.5 g kg<sup>-1</sup> for each metabolite) and infected by *S. aureus* after 6 hours post the  
156 first injection of metabolites. On day 3, animals were euthanized, and their blood and  
157 tissues (kidney and liver) were collected for measurements of NO production, arginase  
158 activity, and urea level. Mice that had received PILV held the highest level of NO in serum  
159 and tissue and the lowest activity of arginase and level of urea in serum, followed by

160 those that had received one metabolite or 4-fold higher concentration of that metabolite  
161 (**Fig. 3E to 3K**). In the absence of *S. aureus* infection, 0.5 g kg<sup>-1</sup> or 2.0 g kg<sup>-1</sup> of each  
162 metabolite or PILV (0.5 g kg<sup>-1</sup> for each metabolite) showed no impact on NO production  
163 (**Fig. S2**). These data suggest that L-leucine, L-proline, L-isoleucine, or L-valine can  
164 strengthen NO production, and PILV combination therapy has an additive effect on NO  
165 production through further inhibition of arginase.

166

### 167 **Metabolites-induced NO protects mice against *S. aureus* infection**

168 Because of the positive correlation between higher protection and NO production of PILV  
169 treatment, we presumed that PILV-induced NO production would be responsible for  
170 higher protection. To test this, we used one competitive arginase inhibitor called BEC,  
171 which shows no effect on NO production and urea level under physiological condition  
172 while enhancing NO production and decreasing urea level in serum samples of *S.*  
173 *aureus*-infected mice (**Fig. 4A and 4B**). Further survival assay presented that BEC  
174 protected against lethal challenge with MRSA strain USA300 (**Fig. 4C**). These data  
175 indicate that increasing NO production has the benefit of getting rid of MRSA infection.  
176 Then we investigated the effects of two NO inhibitors, L-NMMA, and L-NAME, on  
177 PILV-induced NO production and survival. As expected, the inhibitors significantly  
178 suppressed NO production induced by *S. aureus* infection in the absence or presence of  
179 PILV (**Fig. 4D**). The mouse survival caused by *S. aureus* infection or enhanced by PILV  
180 administration was all reduced by the NO inhibitors (**Fig. 4E**). Together, these data prove  
181 that PILV-induced NO production confers protection against staphylococcal disease.

182



183 **Metabolites increase phagocytic killing of *S. aureus* in a NO-dependent manner**

184 We next asked if the PILV has a function in human blood. *S. aureus* opsonophagocytic  
185 killing (OPK) was measured in human blood infected with  $5 \times 10^6$  CFU Newman for 60  
186 min. Before that, blood was pretreated with heat-killed *S. aureus* Newman for 30 min at  
187 37°C. When added to blood samples, PILV reduced the bacterial load to 75% (**Fig. 5A**),  
188 indicating the anti-infective role of PILV in human blood. Treatment of human blood with  
189 NO inhibitor abolished OPK of Newman in the absence or presence of PILV (**Fig. 5A**).  
190 Similar results were found when measuring the OPK of *S. aureus* in mouse blood (**Fig.**  
191 **5B**). Further, the specific phagocytosis of *S. aureus* Newman was determined in  
192 macrophage cell lines, RAW264.7, and differentiated U937 cells. As anticipated, NO  
193 inhibitor or cytochalasin D completely removed PILV-enhanced phagocytosis of *S.*  
194 *aureus* in either human or mouse macrophages (**Fig.5C and 5D**). Altogether, these data  
195 demonstrate that PILV promotes the phagocytic killing of *S. aureus* in a NO-dependent  
196 manner.

197

198 **Discussion**

199 NO is a versatile effector that plays a central role both in the antimicrobial activity and  
200 immunomodulatory roles. During infection, the high cytotoxic NO level produced by  
201 innate immune cells of mammalian host limits pathogen growth (24). Although *S. aureus*  
202 has several genes for efficient NO detoxification, NO production is still critical for host  
203 resistance to staphylococcal disease (25-27). Besides the growth inhibition, NO can  
204 additionally target the Agr quorum sensing system to disrupt cell-to-cell communication of  
205 *S. aureus*, thereby suppressing the staphylococcal virulence (28). On the other hand, NO  
206 acts as a signaling messenger that promotes the growth and activity of immune cell types,

207 including macrophages and neutrophils (24, 29). Inhibition of inducible NOS (iNOS) or  
208 total NOS in macrophages or peripheral blood neutrophils significantly blocks  
209 phagocytosis, intracellular killing, and increases the survival of *S. aureus* (23, 30-32).  
210 These observations result in the development of NO delivery systems that can harness  
211 the antimicrobial properties of this short-lived, evanescent gas (24, 33). Here we found  
212 another interesting way to enhance endogenous NO production in the presence of *S.*  
213 *aureus* infection through a combination therapy using four metabolites that were  
214 determined from a metabolomics study.

215

216 Metabolomics is an advanced technology that examines metabolic processes, identifies  
217 relevant biomarkers responsible for metabolic features, and discloses metabolic  
218 mechanisms. Analysis of the crucial metabolites in samples with different status has  
219 virtually become a significant part of improving the diagnosis, prognosis, and therapy of  
220 diseases (34). A platform for identifying metabolite biomarkers has been established in a  
221 mouse model of *Klebsiella pneumoniae* challenge (23). In that study, we garnered a  
222 potential anti-infection metabolite, L-valine, which presents an elevated level in surviving  
223 mice but a reduced level in dying mice. The supplementation of exogenous L-valine  
224 promotes the clearance of bacterial pathogens and enhances macrophage phagocytosis  
225 in a PI3K/Akt1 and NO-dependent manner. Using the same platform, we currently  
226 discovered four metabolite biomarkers from *S. aureus* bloodstream infection in an animal  
227 model. These metabolites are L-proline, L-iso-leucine, L-leucine, and L-valine, the  
228 abundance of which becomes higher in plasma while infection dose increases, revealing  
229 the intriguing interrelationship between metabolites and infection status. The follow-up  
230 experiments not only evidence the contribution of metabolites in host resistance to

231 staphylococcal infection but also provide the mechanistic link between metabolites and its  
232 anti-infection activity.

233

234 Using screening metabolites from differential metabolomics to combat bacterial infections  
235 have been well demonstrated in several studies. Plenty of metabolites, including glucose,  
236 malate, N-acetylglucosamine, Myo-inositol, linoleic acid, L-proline, L-valine, and  
237 L-leucine, show extended protection against bacterial infections (18-20, 22-24, 35, 36).  
238 However, the mechanistic investigations underlying their anti-infection properties are  
239 minimal. Earlier works showed the inhibitory effect of L-proline, L-isoleucine, L-leucine,  
240 and L-valine on arginase activities, and this inhibition is relatively specific as other amino  
241 acids, such as glycine, L-glutamine, do not influence arginase activities (37-39). Arginase  
242 inhibition by L-valine increases NO production in endothelial cells and macrophages in  
243 response to LPS treatment (23, 40). Specific elimination of arginase in macrophages  
244 favors host survival in *Toxoplasma gondii* infection and reduces the bacterial loads in the  
245 lung infection with *Mycobacterium tuberculosis* (41). Although *S. aureus* bloodstream  
246 infection co-induced expressions of NOS and arginase in the present study, the  
247 enzymatic role of arginase is distinctly more robust than that of NOS. Interestingly,  
248 L-proline, L-isoleucine, L-leucine, or L-valine is capable of boosting NO production via the  
249 inhibition of *S. aureus*-induced arginase activity in infected hosts. More importantly, the  
250 combined administration of L-proline, L-isoleucine, L-leucine, and L-valine has an  
251 additive effect on arginase inhibition, therefore providing the stronger protection against *S.*  
252 *aureus* infection largely through a mechanism that the more L-arginine is consumed by  
253 NOS to produce NO. There are two described isoforms of arginase, arginase I and  
254 arginase II, which are located on cytosol and mitochondria, respectively. Branched-chain  
255 amino acids (L-isoleucine, L-leucine, and L-valine) cause significant inhibition of cytosolic

256 arginase I and only minor effect on mitochondrial arginase II, while L-proline has much  
257 more inhibition of mitochondrial arginase II than the cytosolic arginase II (37). This  
258 evidence probably explains why the more substantial effect of arginase inhibition only  
259 happens in combined administration of L-proline and branched-chain amino acids but not  
260 in the administration of 4-fold higher concentration of each that metabolite. Further  
261 investigation is required to determine whether the explanation mentioned above for the  
262 additive effect occurs in our mouse model of *S. aureus* bloodstream infection or other  
263 mechanisms are involved. Additionally, *S. aureus* also encodes for its arginase, which  
264 might as well behave like its host counterpart, thereby quenching away the L-arginine for  
265 NOS and eventually generating less amount of NO (16, 42, 43). The inhibitory effect of  
266 L-proline and branched-chain amino acids on staphylococcal arginase will need to be  
267 determined in future studies.

268

269 It is astounding that host employs L-proline and branched-chain amino acids as  
270 anti-infection metabolites against *S. aureus* bloodstream infection since *S. aureus* growth  
271 in media lacking L-proline, L-valine, or L-leucine shows an amino acid auxotrophy, albeit  
272 this bacteria genome contains entire gene sets for the biosynthesis of these amino acids  
273 (44, 45). The prevailing situation we can imagine upon staphylococcal infection is that the  
274 host should limit the production of these amino acids so that this pathogen is unable to  
275 have abundant nutrients to grow immoderately. However, the fact says differently, which  
276 exhibits the elevation of these amino acids in the serum of infected animals. Consistent  
277 with the observation, *S. aureus* infection reduces the transcriptional level of  
278 branched-chain amino acid transaminase 2 that mainly contributes to the degradation of  
279 branched-chain amino acids (46), suggesting the lower degradation rate of  
280 branched-chain amino acids in infected mice. Instead of aiding the growth of *S. aureus*,

281 exogenous supplementation of L-proline and branched-chain amino acids facilitates the  
282 phagocytes-mediated OPK of *S. aureus* and the elimination of staphylococci in the host.  
283 The mechanism of how the host accumulates a high level of L-proline and  
284 branched-chain amino acids *in vivo* upon staphylococcal infection is unknown and will be  
285 determined in future studies. TLR2/TLR6 agonist stimulates the significant increase of  
286 L-valine and L-isoleucine in mouse serum sample (10), which provides the clue *that S.*  
287 *aureus*-derived lipoteichoic acid and peptidoglycan might play a role in the induction of  
288 L-proline and branched-chain amino acids in infected animals.

289

## 290 **Materials and methods**

### 291 **Bacterial strains, culture conditions, and experimental animals**

292 *S. aureus* strain Newman (ATCC 25904), USA300 (ATCC BAA-1717), or MRSA252  
293 (ATCC BAA-1720) was cultured from frozen stocks in tryptic soy agar (TSA) at 37°C  
294 incubator. The single colony was grown in tryptic soy broth (TSB) in a shaker bath at  
295 37°C. Overnight cultures were diluted 1:100 into fresh medium and harvested at an  
296 absorbance of 1.0 (OD<sub>600</sub>) by centrifugation at 6000 g for 10 min. The cells were washed  
297 and re-suspended in sterile PBS. Female BALB/c mice (6 weeks old) were reared in  
298 cages fed with sterile water and dry pellet diets. Each mouse was then intravenously  
299 infected by inoculation with the low ( $0.3 \times 10^7$ ), moderate ( $0.7 \times 10^7$ ), or high ( $1 \times 10^7$ )  
300 CFU of *S. aureus* Newman or with sterile PBS (no-infection group). Between 50 and 100  
301  $\mu$ L blood were collected from the orbital vein of each mouse at 12 h post-infection.

302

### 303 **Plasma metabolite extraction**

304 The metabolite extraction procedure was performed following methods described  
305 previously (23, 47). In brief, 50  $\mu$ L plasma was quenched by using 50  $\mu$ L cold methanol  
306 and collected by centrifugation at 8,000 rpm for 3 min. This step was performed twice.  
307 The two supernatants were mixed, and an aliquot of sample was transferred to a GC  
308 sampling vial containing 5  $\mu$ L 0.1 mg/mL ribitol (Sigma) as an internal analytical standard  
309 and then dried in a vacuum centrifuge concentrator before the subsequent derivatization.  
310 Two technical replicates were prepared for each sample. All animal experiments were  
311 performed following institutional guidelines following the experimental protocol review.

312

### 313 **Derivatization and GC-MS analysis**

314 Sample derivatization and subsequent GC-MS analysis were carried out as described  
315 previously (22, 23). Briefly, 80  $\mu$ L of methoxamine/pyridine hydrochloride (20 mg/mL) was  
316 introduced to dried samples to induce oximation for 1.5 h at 37°C, and then 80  $\mu$ L of the  
317 derivatization reagent MSTFA (Sigma) was mixed and reacted with the sample for 0.5 h  
318 at 37°C. A 1  $\mu$ L aliquot of the derivative of the supernatant was added to a tube and  
319 analyzed using GC-MS (Trace DSQ II, Thermo Scientific). For data processing, spectral  
320 deconvolution and calibration were performed using AMDIS and internal standards. A  
321 retention time (RT) correction was operated in all samples, and then the RT was used as  
322 a reference against which the remaining spectra were queried, and a file containing the  
323 abundance information for each metabolite in all samples was assembled. Metabolites  
324 from the GC-MS spectra were identified by searching in the National Institute of  
325 Standards, and Technology (NIST) library used the NIST MS search 2.0. The resulting  
326 data matrix was normalized using the concentrations of exogenous internal standards,

327 which were subsequently removed so that the data could be used for modeling consisted  
328 of the extracted compound. The resulting normalized peak intensities formed a single  
329 matrix with Rt-m/z pairs for each file in the dataset. To reduce the between-sample  
330 variation, we centered the imputed metabolic measures for each tissue sample on its  
331 median value and scaled it by its interquartile range (48). ClustVis, a web tool for  
332 visualizing the clustering of multivariate data, was employed to create PCA plot and  
333 heatmaps (49). Metabolic pathways were enriched by utilizing MetaboAnalyst 4.0 (50).

334

### 335 **Effect of metabolites on *S. aureus* infection**

336 Female BALB/c mice were acclimatized for three days and then randomly divided into  
337 groups for investigating the effects of L-proline, L-isoleucine, L-valine, L-leucine, or a  
338 mixture of four metabolites as mentioned above (L-proline, L-isoleucine, L-leucine, and  
339 L-valine, designated as PILV). Before the infection of *S. aureus* Newman, 100 µl of each  
340 metabolite (0.5 g kg<sup>-1</sup>) or an equal volume of sterile saline (no metabolite control) was  
341 intraperitoneally injected. 6h later, mice were intravenously challenged by *S. aureus*  
342 Newman (1 × 10<sup>7</sup> CFU/mouse) and continued to be given the metabolites daily by  
343 intraperitoneal injection. Bodyweight of infected animals was measured daily. On day 15  
344 following infection, mice were euthanized by CO<sub>2</sub> inhalation and cervical dislocation. Both  
345 kidneys were separated, and bacterial load in one organ was detected by homogenizing  
346 tissue with PBS containing 0.1% Triton X-100. Serial dilutions of homogenate were  
347 sampled on TSA and incubated for colony formation overnight at 37°C. The remaining  
348 organ was investigated by histopathology analysis (51). For survival, *S. aureus* USA300  
349 or MRSA252 were chosen. Six weeks old BLAB/c mice were intravenously inoculated  
350 with 100 µl of bacterial suspension in PBS at a concentration of 2 × 10<sup>8</sup> CFU ml<sup>-1</sup>

351 (USA300) or  $2 \times 10^9$  CFU ml<sup>-1</sup> (MRSA252). Each metabolite, PILV, BEC  
352 (S-(2-boronoethyl)-L-cysteine, arginase inhibitor, 50 mg kg<sup>-1</sup>), or both of nitric oxide (NO)  
353 inhibitor (L-NMMA or L-NAME, 40 mg kg<sup>-1</sup>) and PILV was given at the manner as  
354 mentioned earlier. PILV was administrated with 100 µl in PBS at a concentration of 0.5 g  
355 kg<sup>-1</sup> for each metabolite. Survival was monitored over 14 days.

356

### 357 **Determination of NO release, urea and arginase activity**

358 NO release in serum or tissues was calculated by examining the nitrate and nitrite  
359 concentrations with a Total Nitric Oxide Assay Kit (Beyotime, China) according to the  
360 manufacturer's instructions. The optical densities at 540 nm were recorded using a  
361 Microplate Reader (Biotek Instruments, Inc., Vermont, USA). The concentration of NO  
362 output was calculated from the standard curve. Urea production in serum was determined  
363 using a Urea Colorimetric Assay Kit (BioVision). The mouse serum was collected for the  
364 Arginase Activity Assay kit (Sigma, MAK112).

365

### 366 **Quantitative real-time PCR**

367 Total RNA was isolated from blood and tissues using TRIzol reagent, respectively  
368 (Invitrogen, Carlsbad, CA, USA). The cDNA was synthesized according to the  
369 manufacturer's instruction of the PrimeScript<sup>TM</sup> RT reagent Kit with the genomic DNA  
370 Eraser (Takara, Kyoto, Japan). Then, the mRNA levels of genes Arg1, Arg2, NOS1,  
371 NOS2, and NOS3 were detected using quantitative real-time polymerase chain reaction  
372 (qRT-PCR) with TB Green<sup>TM</sup> Premix Ex Taq<sup>TM</sup> II (Takara) in the LightCycler96 system  
373 (Roche, Indianapolis, IN, USA). The housekeeping gene β-Actin (ACTB) was used as an



374 endogenous control. All primers are listed in Table S1. The qRT-PCR conditions were as  
375 follow 95 °C for 5 min followed by 45 cycles of 95 °C for 10 s, 58 °C for 30 s and 72 °C for  
376 30 s. For the final melting curve step, the samples were subjected to 95 °C for 10 s and  
377 65 °C for 1 min and then ramped to 97 °C by 5 °C every 1 s with a final cooling step at  
378 37 °C. After three repeated PCRs, the gene expression levels were calculated using the  
379  $2^{-\Delta\Delta CT}$  method (52).

380

### 381 **Bacterial survival in human and mouse blood**

382 To measure bacterial replication and survival ex vivo, fresh human blood was collected  
383 with heparin, an anti-coagulated reagent. Prior to incubating with 50 µl of a live bacterial  
384 suspension containing  $5 \times 10^6$  CFU, 0.45 ml of human blood was pretreated by 50 µl of  
385 heat-killed *S. aureus* Newman ( $5 \times 10^5$  CFU) at 37°C for 30 min. Then the human blood  
386 sample was mixed with live bacterial suspension in the presence or absence of PILV (10  
387 mM for each metabolite), NO inhibitor (L-NMMA or L-NAME), or both. For mouse blood  
388 studies, 100 µl of heat-killed *S. aureus* Newman ( $5 \times 10^5$  CFU) was intravenously injected  
389 into BALB/c mouse. 6 h later, whole blood was collected by cardiac puncture. 50 µl of a  
390 live bacterial suspension including  $5 \times 10^5$  CFU *S. aureus* Newman was mixed with 0.45  
391 ml of mouse blood in the presence or absence of PILV (10 mM for each metabolite), NO  
392 inhibitor (L-NMMA or L-NAME), or both. All these samples were incubated at 37°C with  
393 slow rotation for 60 min. After that, 0.55 ml of lysis buffer (0.5% saponin, 200 U  
394 streptokinase, 100 µg trypsin, 2 µg DNase, 10 µg RNase per ml PBS) was added to each  
395 sample for 10 min at 37°C before plating on TSA for enumeration of CFU (53, 54).

396

## 397 **Cell culture and quantitative phagocytosis assay**

398 The murine macrophage cell line RAW264.7 was cultured in DMEM supplemented with  
399 10% (V/V) cosmic calf serum (HyClone), 100 U mL<sup>-1</sup> penicillin G and 100 U/mL  
400 streptomycin. The human macrophage cell line U937 was grown in RPMI 1640 medium  
401 supplemented with 10% heat-activated fetal bovine serum. All cells were grown at 37°C  
402 in a 5% CO<sub>2</sub> incubator. U937-derived macrophages were induced by 160 nM phorbol  
403 12-myristate 13-acetate (PMA) at 37°C for 48 h. Macrophage phagocytosis was  
404 investigated as described previously (22, 23). Briefly, RAW264.7 cells were harvested  
405 using CaCl<sub>2</sub>- and MgCl<sub>2</sub>-free PBS containing 5 mM EDTA and plated at 5 × 10<sup>6</sup>  
406 macrophages/well in 6-well plate. U937-derived macrophages were seeded at 1 × 10<sup>6</sup>  
407 cells/well in a 12-well plate. For experiments with the administration of PILV, NO inhibitor,  
408 or both, the cells were deprived of serum overnight and then incubated with the  
409 molecules as mentioned above in serum-starved media. After pretreating for 6 h,  
410 FITC-conjugated *S. aureus* was centrifuged onto RAW264.7 or U937-derived  
411 macrophages at a multiplicity of infection (MOI) of 100 in the indicated medium without  
412 serum or antibiotics. Then, the plates were placed at 37 °C for 1 h. After incubation, the  
413 macrophages were vigorously washed with cold PBS to stop additional bacterial uptake  
414 or to destroy the bacteria in the phagosomes. Cells were washed at least four times in  
415 cold PBS and then fixed in 4% paraformaldehyde before being harvested in cold PBS  
416 containing 5 mM EDTA and subjected to FACS® analysis.

417

## 418 **Statistical Analysis**

419 The relative abundance of metabolites among different groups, staphylococcal survival in  
420 blood, NO and urea levels, or macrophage phagocytosis was analyzed with the two-tailed

421 Student *t*-test. Bacterial loads and abscess numbers in renal tissues were analyzed with  
422 the two-tailed Mann–Whitney test. All data were analyzed by GraphPad Prism (GraphPad  
423 Software, Inc.), and *P* values < 0.05 were considered significant.

424

#### 425 **Acknowledgments**

426 This work was supported by the National Natural Science Foundation of China grant  
427 31700119 and the Natural Science Foundation of Guangdong Province grant  
428 2019A1515012211 to Jinan University, the GDIM Young Elite Talents Project grant  
429 GDIMYET20170104 to Guangdong Institute of Microbiology, the Shenzhen Science and  
430 Technology Innovation Commission Project grant JCYJ20170815113109175 and the  
431 Dapeng Project grant KY20170202 to Shenzhen International Institute for Biomedical  
432 Research.

433

#### 434 **Author contributions**

435 X.C., R.P., Y.S., developed methods and conceptualized ideas. R.P., Y.S., H.Z., X.C.,  
436 designed experiments, X.C., R.P., Y.S., performed experiments, X.C., R.P., analyzed  
437 data, X.C., R.P., wrote the manuscript.

438

#### 439 **Competing interests**

440 We declare no conflicts of interest.

441

#### 442 **Reference**

- 443 1. Wertheim HF, Melles DC, Vos MC, van Leeuwen W, van Belkum A, Verbrugh HA,  
444 Nouwen JL. 2005. The role of nasal carriage in *Staphylococcus aureus* infections.  
445 The Lancet infectious diseases 5:751-762.
- 446 2. Lebon A, Labout JA, Verbrugh HA, Jaddoe VW, Hofman A, van Wamel W, Moll  
447 HA, van Belkum A. 2008. Dynamics and determinants of *Staphylococcus aureus*  
448 carriage in infancy: the Generation R Study. Journal of clinical microbiology  
449 46:3517-3521.
- 450 3. Verhoeven PO, Gagnaire J, Botelho-Nevers E, Grattard F, Carricajo A, Lucht F,  
451 Pozzetto B, Berthelot P. 2014. Detection and clinical relevance of *Staphylococcus*  
452 *aureus* nasal carriage: an update. Expert review of anti-infective therapy  
453 12:75-89.
- 454 4. Wertheim HF, Vos MC, Ott A, van Belkum A, Voss A, Kluytmans JA, van Keulen  
455 PH, Vandenbroucke-Grauls CM, Meester MH, Verbrugh HA. 2004. Risk and  
456 outcome of nosocomial *Staphylococcus aureus* bacteraemia in nasal carriers  
457 versus non-carriers. The Lancet 364:703-705.
- 458 5. Van Rijen M, Bonten M, Wenzel R, Kluytmans J. 2008. Mupirocin ointment for  
459 preventing *Staphylococcus aureus* infections in nasal carriers. Cochrane  
460 Database Syst Rev 4.
- 461 6. Simor AE. 2011. Staphylococcal decolonisation: an effective strategy for  
462 prevention of infection? The Lancet infectious diseases 11:952-962.
- 463 7. Hancock RE, Nijnik A, Philpott DJ. 2012. Modulating immunity as a therapy for  
464 bacterial infections. Nature Reviews Microbiology 10:243.
- 465 8. Shin JH, Yang JY, Jeon BY, Yoon YJ, Cho SN, Kang YH, Ryu DH, Hwang GS.  
466 2011. 1H NMR-based metabolomic profiling in mice infected with *Mycobacterium*  
467 *tuberculosis*. Journal of proteome research 10:2238-2247.
- 468 9. Dong F, Wang B, Zhang L, Tang H, Li J, Wang Y. 2012. Metabolic response to  
469 *Klebsiella pneumoniae* infection in an experimental rat model. PloS one  
470 7:e51060.
- 471 10. Hoerr V, Zbytnuik L, Leger C, Tam PP, Kubes P, Vogel HJ. 2012. Gram-negative  
472 and Gram-positive bacterial infections give rise to a different metabolic response  
473 in a mouse model. Journal of proteome research 11:3231-3245.
- 474 11. Holtfreter S, Kolata J, Stentzel S, Bauerfeind S, Schmidt F, Sundaramoorthy N,  
475 Bröker B. 2016. Omics approaches for the study of adaptive immunity to  
476 *Staphylococcus aureus* and the selection of vaccine candidates. Proteomes 4:11.
- 477 12. Ambroggio L, Florin TA, Shah SS, Ruddy R, Yeomans L, Trexel J, Stringer KA.  
478 2017. Emerging biomarkers of illness severity: urinary metabolites associated  
479 with sepsis and necrotizing methicillin-resistant *staphylococcus aureus*  
480 pneumonia. Pharmacotherapy: The Journal of human pharmacology and drug  
481 therapy 37:1033-1042.
- 482 13. Slupsky CM, Cheyesh A, Chao DV, Fu H, Rankin KN, Marrie TJ, Lacy P. 2009.  
483 *Streptococcus pneumoniae* and *Staphylococcus aureus* pneumonia induce  
484 distinct metabolic responses. Journal of proteome research 8:3029-3036.
- 485 14. Langley RJ, Tsalik EL, Van Velkinburgh JC, Glickman SW, Rice BJ, Wang C,  
486 Chen B, Carin L, Suarez A, Mohny RP. 2013. An integrated clinico-metabolomic  
487 model improves prediction of death in sepsis. Science translational medicine  
488 5:195ra95.
- 489 15. Bravo-Santano N, Ellis JK, Mateos LM, Calle Y, Keun HC, Behrends V, Letek M.  
490 2018. Intracellular *Staphylococcus aureus* modulates host central carbon  
491 metabolism to activate autophagy. mSphere 3:e00374-00318.
- 492 16. Medina LMP, Becker AK, Michalik S, Yedavally H, Raineri EJ, Hildebrandt P,  
493 Salazar MG, Surmann K, Pförtner H, Mekonnen SA. 2019. Metabolic cross-talk

- 494 between human bronchial epithelial cells and internalized *Staphylococcus aureus*  
495 as a driver for infection. *Molecular & Cellular Proteomics:mcp*. RA118. 001138.
- 496 17. Xiong L, Teng J, Botelho M, Lo R, Lau S, Woo P. 2016. Arginine metabolism in  
497 bacterial pathogenesis and cancer therapy. *International journal of molecular*  
498 *sciences* 17:363.
- 499 18. Du CC Yang MJ, Li MY, Yang J, Peng B, Li H, Peng XX. 2017. Metabolic  
500 mechanism for L-Leucine-induced metabolome to eliminate *Streptococcus iniae*.  
501 *Journal of proteome research* 16:1880-1889.
- 502 19. Yang MJ, Cheng ZX, Jiang M, Zeng ZH, Peng B, Peng XX, Li H. 2018. Boosted  
503 TCA cycle enhances survival of zebrafish to *Vibrio alginolyticus* infection.  
504 *Virulence* 9:634-644.
- 505 20. Ma YM, Yang MJ, Wang S, Li H, Peng XX. 2015. Liver functional metabolomics  
506 discloses an action of l-leucine against *Streptococcus iniae* infection in tilapias.  
507 *Fish & shellfish immunology* 45:414-421.
- 508 21. Guo C, Huang XY, Yang MJ, Wang S, Ren ST, Li H, Peng XX. 2014.  
509 GC/MS-based metabolomics approach to identify biomarkers differentiating  
510 survivals from death in crucian carps infected by *Edwardsiella tarda*. *Fish &*  
511 *shellfish immunology* 39:215-222.
- 512 22. Chen XH, Zhang BW, Li H, Peng XX. 2015. Myo-inositol improves the host's  
513 ability to eliminate balofloxacin-resistant *Escherichia coli*. *Scientific reports*  
514 5:10720.
- 515 23. Chen XH, Liu R, Peng B, Li D, Cheng ZX, Zhu JX, Zhang S, Peng YM, Li H,  
516 Zhang TT. 2017. Exogenous L-valine promotes phagocytosis to kill  
517 multidrug-resistant bacterial pathogens. *Frontiers in immunology* 8:207.
- 518 24. Schairer DO, Chouake JS, Nosanchuk JD, Friedman AJ. 2012. The potential of  
519 nitric oxide releasing therapies as antimicrobial agents. *Virulence* 3:271-279.
- 520 25. Richardson AR, Dunman PM, Fang FC. 2006. The nitrosative stress response of  
521 *Staphylococcus aureus* is required for resistance to innate immunity. *Molecular*  
522 *microbiology* 61:927-939.
- 523 26. Kinkel TL, Roux CM, Dunman PM, Fang FC. 2013. The *Staphylococcus aureus*  
524 SrrAB two-component system promotes resistance to nitrosative stress and  
525 hypoxia. *MBio* 4:e00696-00613.
- 526 27. Richardson AR, Libby SJ, Fang FC. 2008. A nitric oxide-inducible lactate  
527 dehydrogenase enables *Staphylococcus aureus* to resist innate immunity.  
528 *Science* 319:1672-1676.
- 529 28. Urbano R, Karlinsey JE, Libby SJ, Doulias PT, Ischiropoulos H, Warheit-Niemi HI,  
530 Liggitt DH, Horswill AR, Fang FC. 2018. Host nitric oxide disrupts microbial  
531 cell-to-cell communication to inhibit staphylococcal virulence. *Cell host & microbe*  
532 23:594-606. e597.
- 533 29. Tripathi P, Tripathi P, Kashyap L, Singh V. 2007. The role of nitric oxide in  
534 inflammatory reactions. *FEMS Immunology & Medical Microbiology* 51:443-452.
- 535 30. Li C, Li H, Jiang Z, Zhang T, Wang Y, Li Z, Wu Y, Ji S, Xiao S, Ryffel B. 2014.  
536 Interleukin-33 increases antibacterial defense by activation of inducible nitric  
537 oxide synthase in skin. *PLoS pathogens* 10:e1003918.
- 538 31. Moffat Jr FL, Han T, Li ZM, Peck MD, Jy W, Ahn YS, Chu AJ, Bourguignon LY.  
539 1996. Supplemental L-arginine HCl augments bacterial phagocytosis in human  
540 polymorphonuclear leukocytes. *Journal of cellular physiology* 168:26-33.
- 541 32. Sakiniene E, Bremell T, Tarkowski A. 1997. Inhibition of nitric oxide synthase  
542 (NOS) aggravates *Staphylococcus aureus* septicaemia and septic arthritis.  
543 *Clinical & Experimental Immunology* 110:370-377.

- 544 33. Park D, Kim J, Lee YM, Park J, Kim WJ. 2016. Polydopamine Hollow Nanoparticle  
545 Functionalized with N-diazeniumdiolates as a Nitric Oxide Delivery Carrier for  
546 Antibacterial Therapy. *Advanced healthcare materials* 5:2019-2024.
- 547 34. Peng B, Li H, Peng XX. 2015. Functional metabolomics: from biomarker discovery  
548 to metabolome reprogramming. *Protein & Cell* 6:628-637.
- 549 35. Cheng ZX, Ma YM, Li H, Peng XX. 2014. N-acetylglucosamine enhances survival  
550 ability of tilapias infected by *Streptococcus iniae*. *Fish & shellfish immunology*  
551 40:524-530.
- 552 36. Zhao X, Wu C, Peng X, Li H. 2014. Interferon- $\alpha$ 2b against microbes through  
553 promoting biosynthesis of unsaturated fatty acids. *Journal of proteome research*  
554 13:4155-4163.
- 555 37. Carvajal N, Cederbaum SD. 1986. Kinetics of inhibition of rat liver and kidney  
556 arginases by proline and branched-chain amino acids. *Biochimica et Biophysica*  
557 *Acta (BBA)-Protein Structure and Molecular Enzymology* 870:181-184.
- 558 38. Pietkiewicz J, Bryła J. 1996. Comparison of influence of 2-oxoglutarate and  
559 glutamate on arginase activities in liver and kidney-cortex of rabbit, *Oryctolagus*  
560 *cuniculus*. *Comparative Biochemistry and Physiology Part B: Biochemistry and*  
561 *Molecular Biology* 115:393-398.
- 562 39. Rao KK, Reddy SRR, Swami KS. 1973. The inhibition of sheep liver arginase by  
563 some L-amino-acids. *International Journal of Biochemistry* 4:62-70.
- 564 40. Chicoine LG, Paffett ML, Young TL, Nelin LD. 2004. Arginase inhibition increases  
565 nitric oxide production in bovine pulmonary arterial endothelial cells. *American*  
566 *Journal of Physiology-Lung Cellular and Molecular Physiology* 287:L60-L68.
- 567 41. El Kasmi KC, Qualls JE, Pesce JT, Smith AM, Thompson RW, Henao-Tamayo M,  
568 Basaraba RJ, König T, Schleicher U, Koo MS. 2008. Toll-like receptor-induced  
569 arginase 1 in macrophages thwarts effective immunity against intracellular  
570 pathogens. *Nature immunology* 9:1399.
- 571 42. Nuxoll AS, Halouska SM, Sadykov MR, Hanke ML, Bayles KW, Kielian T, Powers  
572 R, Fey PD. 2012. CcpA regulates arginine biosynthesis in *Staphylococcus aureus*  
573 through repression of proline catabolism. *PLoS pathogens* 8:e1003033.
- 574 43. Lahiri A, Das P, Chakravorty D. 2010. New tricks new ways: exploitation of a  
575 multifunctional enzyme arginase by pathogens. *Virulence* 1:563-565.
- 576 44. Emmett M, Kloos WE. 1975. Amino acid requirements of staphylococci isolated  
577 from human skin. *Canadian journal of microbiology* 21:729-733.
- 578 45. Kaiser JC, King AN, Grigg JC, Sheldon JR, Edgell DR, Murphy ME, Brinsmade  
579 SR, Heinrichs DE. 2018. Repression of branched-chain amino acid synthesis in  
580 *Staphylococcus aureus* is mediated by isoleucine via CodY, and by a leucine-rich  
581 attenuator peptide. *PLoS genetics* 14:e1007159.
- 582 46. Koziel J, Maciag-Gudowska A, Mikolajczyk T, Bzowska M, Sturdevant DE,  
583 Whitney AR, Shaw LN, DeLeo FR, Potempa J. 2009. Phagocytosis of  
584 *Staphylococcus aureus* by macrophages exerts cytoprotective effects manifested  
585 by the upregulation of antiapoptotic factors. *PloS one* 4:e5210.
- 586 47. Zhao XL, Han Y, Ren ST, Ma YM, Li H, Peng XX. 2015. L-proline increases  
587 survival of tilapias infected by *Streptococcus agalactiae* in higher water  
588 temperature. *Fish & shellfish immunology* 44:33-42.
- 589 48. Liu SR, Peng XX, Li H. 2019. Metabolic mechanism of ceftazidime resistance in  
590 *Vibrio alginolyticus*. *Infection and Drug Resistance* 12:417.
- 591 49. Metsalu T, Vilo J. 2015. ClustVis: a web tool for visualizing clustering of  
592 multivariate data using Principal Component Analysis and heatmap. *Nucleic acids*  
593 *research* 43:W566-W570.



- 594 50. Chong J, Soufan O, Li C, Caraus I, Li S, Bourque G, Wishart DS, Xia J. 2018.  
595 MetaboAnalyst 4.0: towards more transparent and integrative metabolomics  
596 analysis. *Nucleic acids research* 46:W486-W494.
- 597 51. Kim HK, Falugi F, Thomer L, Missiakas DM, Schneewind O. 2015. Protein A  
598 suppresses immune responses during *Staphylococcus aureus* bloodstream  
599 infection in guinea pigs. *MBio* 6:e02369-02314.
- 600 52. Livak KJ, Schmittgen TD. 2001. Analysis of relative gene expression data using  
601 real-time quantitative PCR and the 2(-Delta Delta C(T)) Method. *Methods*  
602 25:402-408.
- 603 53. Thomer L, Emolo C, Thammavongsa V, Kim HK, McAdow ME, Yu W, Kieffer M,  
604 Schneewind O, Missiakas D. 2016. Antibodies against a secreted product of  
605 *Staphylococcus aureus* trigger phagocytic killing. *Journal of Experimental*  
606 *Medicine* 213:293-301.
- 607 54. Chen X, Sun Y, Missiakas D, Schneewind O. 2018. *Staphylococcus aureus*  
608 decolonization of mice with monoclonal antibody neutralizing protein A. *The*  
609 *Journal of infectious diseases* 219:884-888.
- 610

611

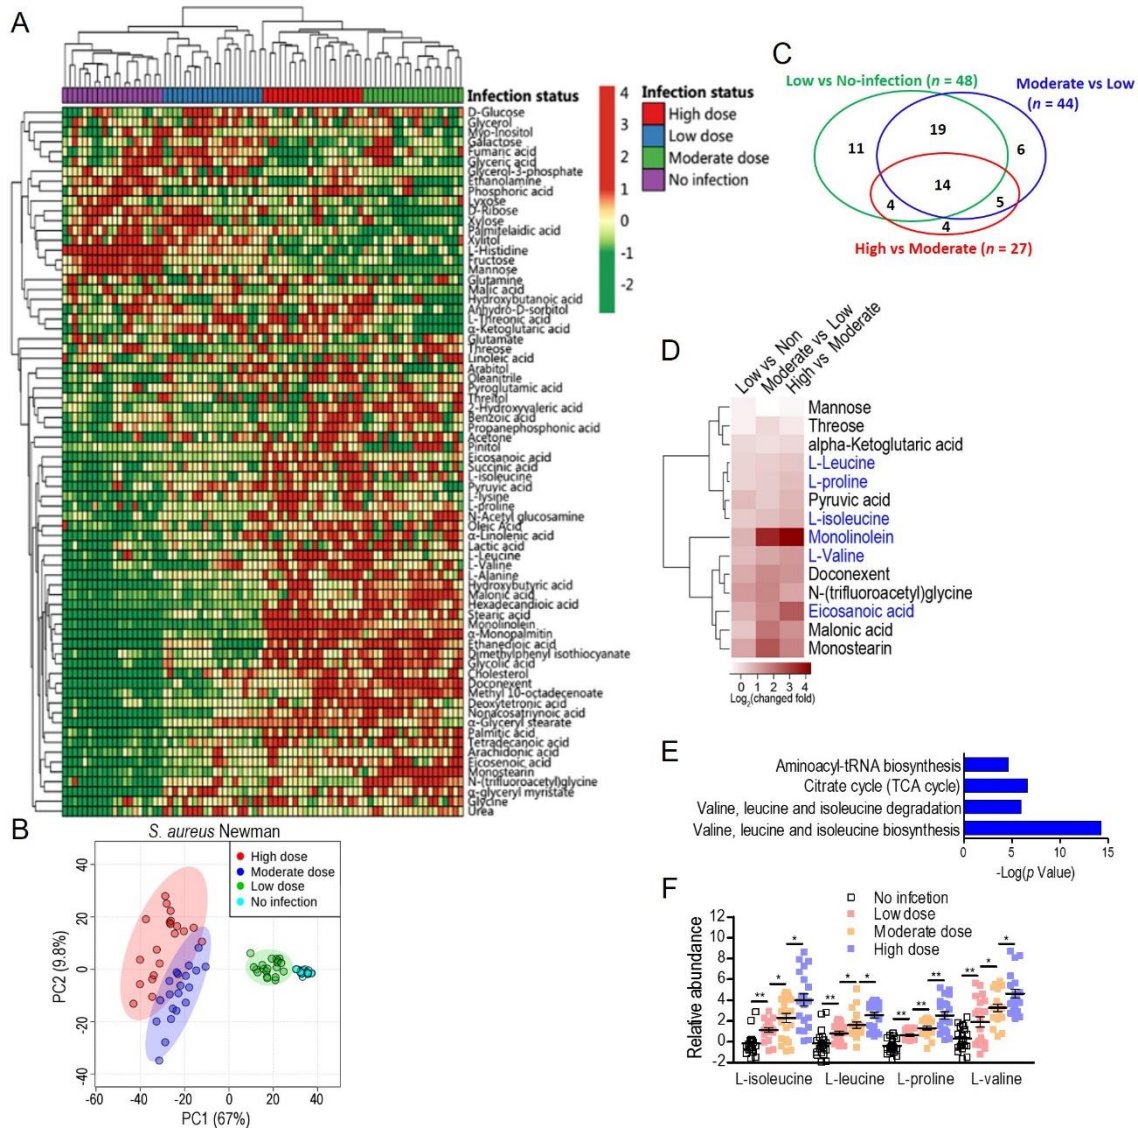

612

613 **Figure 1. Serum metabolome analysis by GC-MS reveals L-isoleucine,**  
 614 **L-leucine, L-proline, and L-valine as potential anti-infection metabolites**  
 615 **against *S. aureus* infection. (A)** The heat map showed the relative abundance  
 616 of total 72 metabolites in serum samples from mice infected by low dose ( $0.3 \times$   
 617  $10^7$  CFU), moderate dose ( $0.7 \times 10^7$  CFU), and high dose ( $1 \times 10^7$  CFU) of *S.*  
 618 *aureus* Newman strain, respectively, or PBS as no-infection control. **(B)** Principal  
 619 component analysis (PCA) led to the metabolomics discrimination among



620 no-infection control, low dose, moderate dose, and high dose groups. **(C)** Venn  
621 diagram of 48 differential metabolites from the comparison of the low-dose group  
622 (Low) to the no-infection group, 44 differential metabolites from the comparison of  
623 the moderate-dose group (Moderate) to Low, and 27 differential metabolites from  
624 the comparison of the high-dose group (High) to Moderate. **(D)** Heat map  
625 representation of unsupervised hierarchical clustering of fourteen overlapped  
626 metabolites in **(C)**. **(E)** Pathway enrichment analysis of fourteen overlapped  
627 metabolites. A horizontal histogram was selected to show the impact of the  
628 enriched pathway with  $P$  values  $< 0.01$ . **(F)** The abundance of L-isoleucine,  
629 L-leucine, L-proline, and L-valine in no-infection, Low, Moderate, and High dose  
630 groups. Error bars  $\pm$  SEM, \*  $P < 0.05$  and \*\*  $P < 0.01$ .

631

632

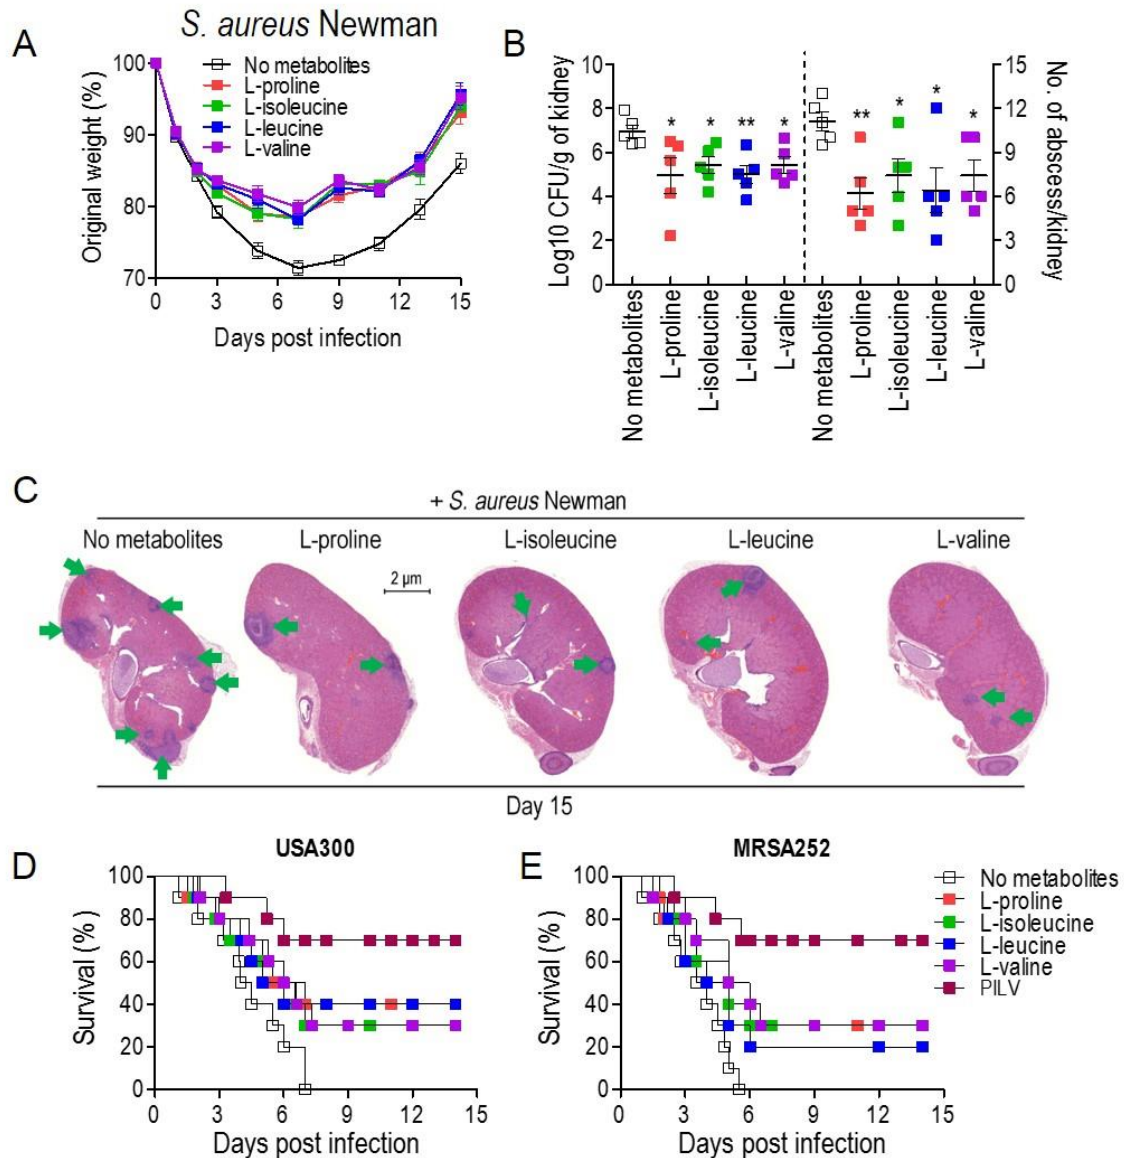

633

634 **Figure.2 The administration of single metabolite or metabolite combination**  
 635 **(named PILV) protects mice against *S. aureus* bloodstream infection. (A to C)**

636 The treatment of each metabolite, L-proline, L-isoleucine, L-leucine, or L-valine,  
 637 rescued body weight loss **(A)** and reduced renal bacterial loads and abscess  
 638 numbers **(B and C)** from mice infected by *S. aureus* Newman strain. Weight was  
 639 recorded daily and reported as % of initial weight. Fifteen days post infection,

640 kidneys ( $n = 5$ ) were removed, and either ground for enumeration of CFU/g tissue  
641 or fixed for counting of surface abscesses **(B)**. Fixed kidneys were additionally  
642 thin sectioned and then stained with hematoxylin and eosin (H&E) for internal  
643 abscesses **(C)**. Green arrows point to internal abscesses in the kidney. **(D and E)**  
644 The treatment of single metabolite or metabolite combination (L-proline,  
645 L-isoleucine, L-leucine, and L-valine, designated as PILV) protected mice  
646 (BALB/c,  $n = 20$ ) against lethal bloodstream infection with *S. aureus* USA300 **(D)**  
647 and MRSA252 **(E)**. Survival was monitored over fourteen days. Data are  
648 represented as Error bars  $\pm$  SEM. \*  $P < 0.05$  and \*\*  $P < 0.01$ .

649

650

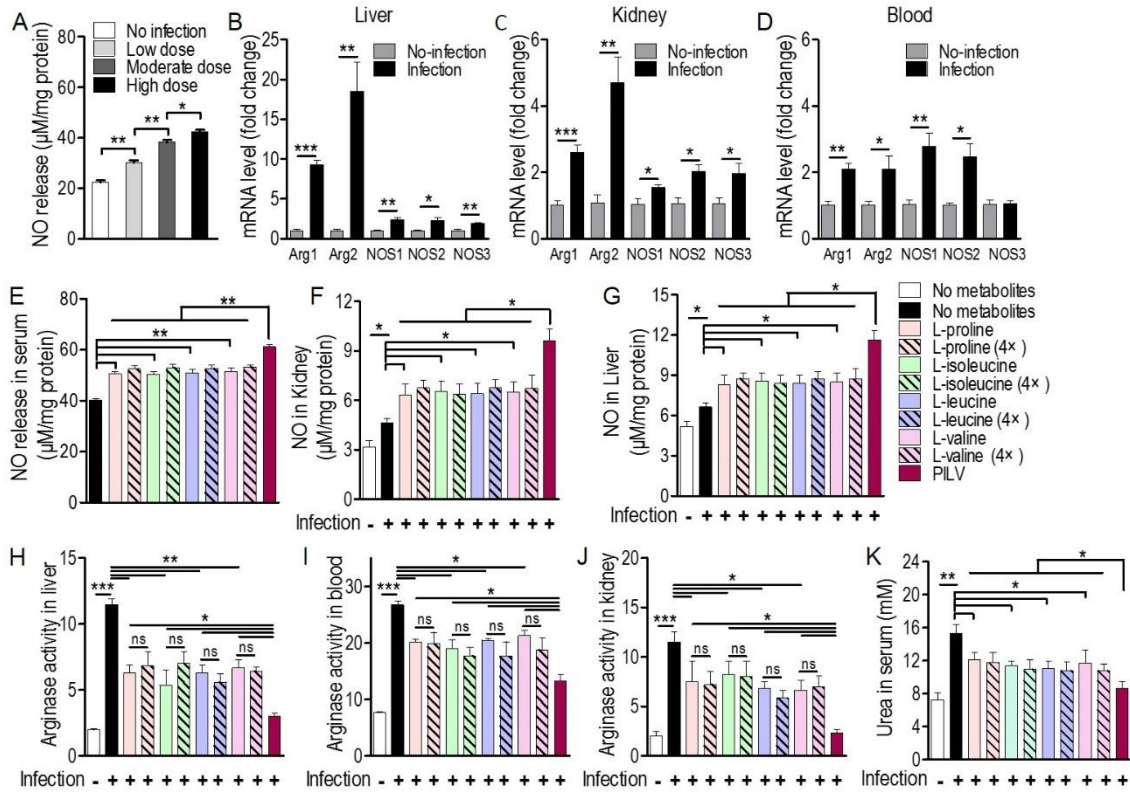

651

652 **Figure 3. Metabolites promote NO production by inhibition of arginase in**

653 **mice. (A)** Staphylococcal infection enhanced NO release in a dose-dependent

654 manner. Three sublethal doses from low to high ( $0.3 \times 10^7$ ,  $0.7 \times 10^7$ , and  $1 \times 10^7$

655 CFU/mouse) of *S. aureus* Newman strain was used to intravenously infect mice ( $n$

656 = 5 for each dose group). Three days post infection, mouse serum was collected

657 and subjected to the measurement of NO release. **(B to D)** The mRNA levels of

658 two arginase (Arg) and three NO synthase (NOS) isoforms in mouse liver, kidney,

659 and blood were up-regulated by a sublethal staphylococcal infection. *S. aureus*

660 USA300 ( $5 \times 10^6$  CFU/mouse) was used to infect BALB/c mice ( $n = 5$ ). Three days

661 post infection, mouse liver, kidney, and blood were collected and then subjected

662 to estimate the transcriptional expression of Agr and NOS. Agr1 and Agr2 are

663 cytoplasmic and mitochondrial arginase, respectively. NOS1, NOS2, and NOS3

664 are neuronal, inducible, and endothelial NOS, respectively. **(E to J)** Upon  
665 staphylococcal infection, single metabolite or PILV treatment increased NO  
666 production by inhibiting arginase activity in mouse blood and tissues. NO release  
667 was increased by single metabolite treatment and further boosted by PILV  
668 treatment in mouse serum **(E)**, kidney **(F)**, and liver **(G)**. Meanwhile, arginase  
669 activity was decreased by single metabolite treatment and further declined by  
670 PILV treatment in the liver **(H)**, blood **(I)**, and kidney **(J)**. **(K)** Staphylococcal  
671 infection-induced urea content was reduced by single metabolite treatment and  
672 further decreased by PILV treatment. Data are represented as Error bars  $\pm$  SEM.  
673 \*  $P < 0.05$  and \*\*  $P < 0.01$ .

674

675

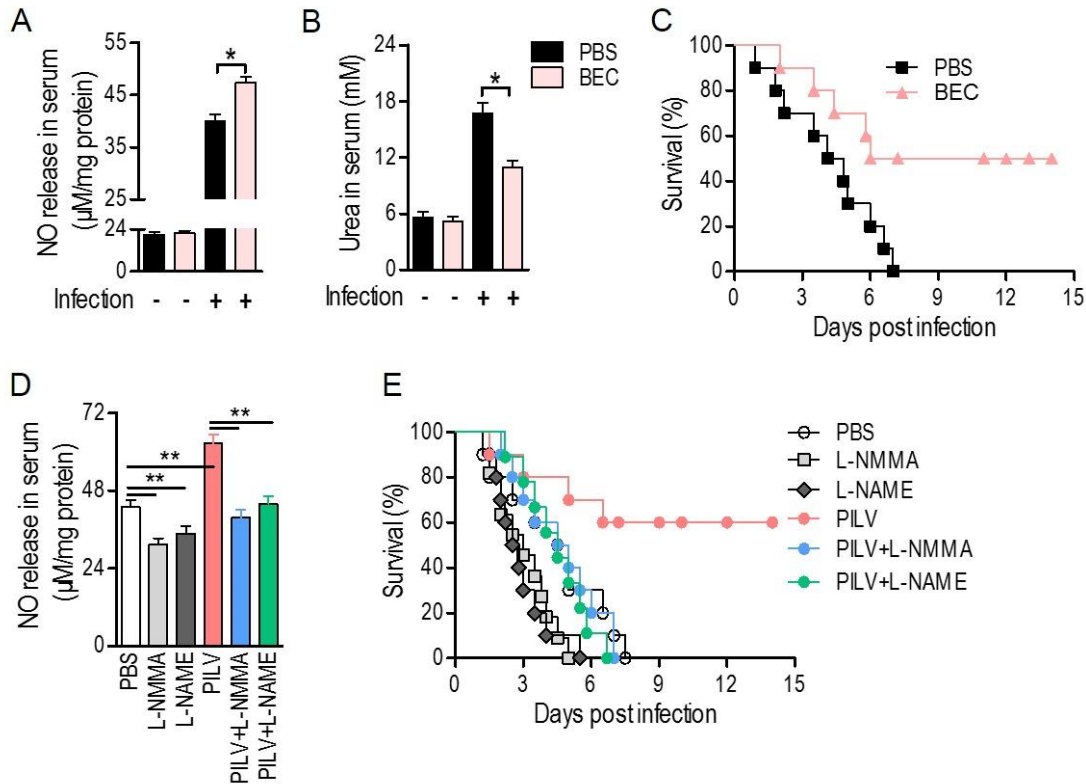

676

677 **Figure 4. Metabolites-induced NO confers protection against**  
 678 **staphylococcal infection. (A to C)** A competitive arginase inhibitor, BEC  
 679 (S-(2-boronoethyl)-L-cysteine), was able to induce NO release **(A)**, inhibit urea  
 680 production **(B)**, and protect mice against lethal bloodstream infection with *S.*  
 681 *aureus* USA300 **(C)**. **(D and E)** Both NO inhibitors, L-NMMA and L-NAME, all  
 682 blocked PILV-induced NO release **(D)** and removed PILV-induced protection **(E)**.  
 683 Six hours after injection of BEC (50 mg kg<sup>-1</sup>), L-NMMA (40 mg kg<sup>-1</sup>), L-NAME (40  
 684 mg kg<sup>-1</sup>), PILV, PILV plus L-NMMA (40 mg kg<sup>-1</sup>), or PILV plus L-NAME (40 mg  
 685 kg<sup>-1</sup>), BALB/c mice (*n* = 30) were lethally challenged by *S. aureus* USA300 and  
 686 then divided into two subgroups. One subgroup (*n* = 10) was used for the  
 687 measurement of NO and urea, and another (*n* = 20) was used for observation of  
 688 survival. Five survival mice (*n* = 10) at three days post infection were euthanized

689 to measure the NO and urea production in serum. Survival was monitored over  
690 fourteen days. Data are represented as Error bars  $\pm$  SEM. \*  $P < 0.05$  and \*\*  $P <$   
691 0.01.

692

693

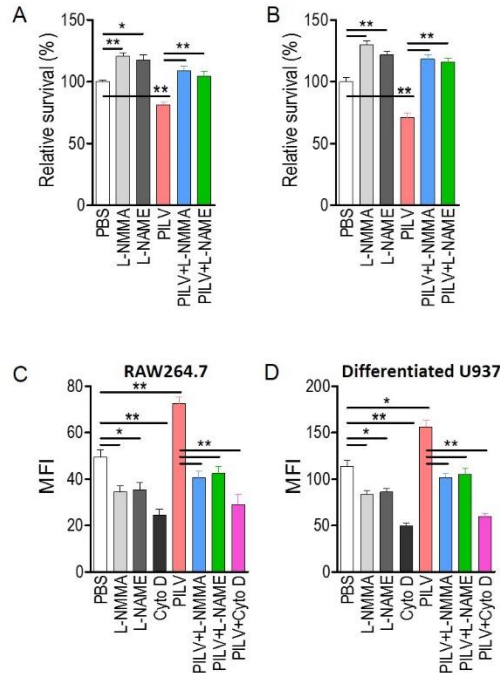

694

695 **Figure 5. PILV enhances Opsonophagocytic killing (OPK) in a**  
696 **NO-dependent manner. (A and B) PILV promoted OPK of *S. aureus* in human**  
697 **(A) and mouse blood (B) through a NO-dependent manner. Anticoagulated and**  
698 **heat-killed *S.aureus* Newman-pretreated mouse and human blood was incubated**  
699 **with live *S. aureus* Newman ( $2.5 \times 10^6$  CFU/ml blood for human blood assay,  $2.5$**   
700  **$\times 10^5$  CFU/ml blood for mouse blood assay) in the presence of PBS, NO inhibitors,**  
701 **PILV, or PILV plus NO inhibitors for 60 min, and survival was measured ( $n = 5$ ). (C**  
702 **and D) PILV increased the phagocytosis of FITC-conjugated *S. aureus* Newman**  
703 **in RAW 264.7 (C) and U937-derived macrophages (D). RAW264.7 or**  
704 **U937-derived macrophages were pretreated with PBS, NO inhibitors, PILV, or**  
705 **PILV plus NO inhibitors in a serum-starved medium for 6 hours and then were**  
706 **co-incubated with FITC-conjugated *S. aureus* for an additional one hour. Bacterial**



707 uptake was measured by flow cytometry. Data are represented as Error bars  $\pm$   
708 SEM. \*  $P < 0.05$  and \*\*  $P < 0.01$ .

709

710

711

712

713

714

715

716

717

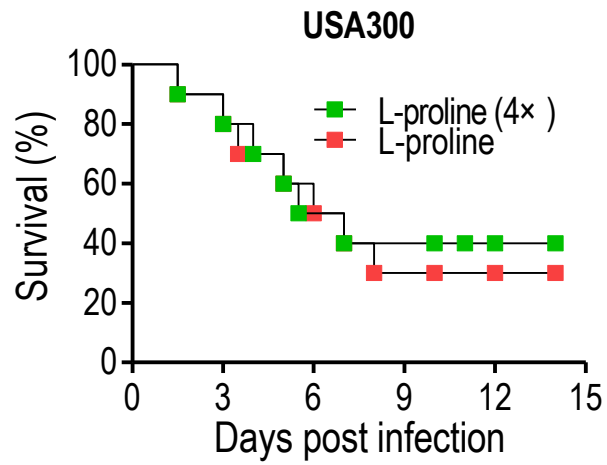

718

719 **Figure S1. An increasing dose of L-proline is not able to increase survival.**

720

721

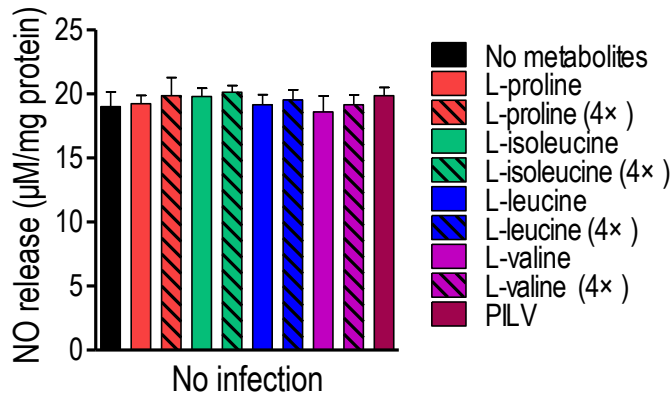

722

723 **Figure S2. Metabolite treatments are not able to increase NO release in the**

724 **mouse without *S. aureus* infection.**

725

726 **Table S1 The primers used in this study**

| Primer name | Sequence                  | Purpose                    |
|-------------|---------------------------|----------------------------|
| Arg1-F      | TGAGCTTTGATGTCGACGGG      | qRT-PCR test for gene Arg1 |
| Arg1-R      | GTTGAGTTCCGAAGCAAGCC      |                            |
| Arg2-F      | TCGGGGACAGAAGAAGCTAGGA    | qRT-PCR test for gene Arg2 |
| Arg2-R      | ACTTCAGCCAGTTCCTGGTTGG    |                            |
| NOS1-F      | CTGGAGACCACCTTCACAGG      | qRT-PCR test for gene NOS1 |
| NOS1-R      | GCATGCTGAGGTCCGTTACT      |                            |
| NOS2-F      | CAGTCCTCTTTGCTACTGAGACAGG | qRT-PCR test for gene NOS2 |
| NOS2-R      | TCTTCAGAGTCTGCCCATTTGCT   |                            |
| NOS3-F      | CCTTCACCCACTGAGCAGCTATT   | qRT-PCR test for gene NOS3 |
| NOS3-R      | TGCAGCTTTCCCCACTGGAT      |                            |
| ACTB-F      | CAAGAGAGGTATCCTGACCCT     | qRT-PCR test for gene ACTB |
| ACTB-R      | TGATCTGGGTCATCTTTTCAC     |                            |

727
